# Supplementary material for: Mycoplasma synoviae lipid-associated membrane proteins identification and expression changes when exposed to chicken cells
Source: Front Vet Sci. 2023 Nov 2;10:1249499. doi: 10.3389/fvets.2023.1249499 (PMC10652285; doi:10.3389/fvets.2023.1249499)
Supplement: Supplementary file 7 [file Table_7.XLSX]

## Sheet: Sheet1
	Virulence factors predicted by VFDB based on 200 LAMPs			Toxin predicted by BTXPred based on 200 LAMPs
Protein ID	VFDB Hit	Score	E-value	Protein ID	Toxin
WP_020003176.1	Elongation factor Tu (Francisella tularensis subsp. tularensis SCHU S4)	580	E-167	WP_020003242.1	Neurotoxin
WP_026365157.1	Mg2+ transport protein (Salmonella enterica subsp. enterica serovar Typhimurium str. LT2)	225	1e-59	WP_020003068.1	Neurotoxin
WP_020002874.1	RNA polymerase sigma factor SigA (Mycobacterium tuberculosis H37Rv)	201	2e-52	WP_046128345.1	Neurotoxin
WP_117274899.1	ABC (ATP-binding cassette) transporter CylA(Streptococcus agalactiae NEM316)	164	7e-42	WP_020003005.1	Neurotoxin
WP_020003248.1	Type III secretion system ATPase（Chlamydia trachomatis D/UW-3/CX）	153	4e-38	WP_020003199.1	Neurotoxin
WP_020003246.1	Type III secretion system ATPase YscN（Yersinia pestis CO92）	133	3e-32	WP_020002812.1	Neurotoxin
WP_020002930.1	Type III secretion system ATPase（Chlamydia trachomatis D/UW-3/CX）	132	9e-32	WP_020002934.1	Neurotoxin
WP_020002815.1	Type III secretion system ATPase（Chlamydia trachomatis D/UW-3/CX）	129	5e-31	WP_158439021.1	Vacuolating cytotoxin
WP_020003218.1	Coxiella Dot/Icm type IVB secretion system translocated effector（Coxiella burnetii RSA 493）	127	7e-31	WP_020002954.1	Bacterial toxin,Exotoxin
WP_020003170.1	RTX toxin transporter RtxB（Vibrio cholerae O1 biovar El Tor str. N16961）	124	9e-30
WP_117274878.1	ABC transporter, ATP-binding protein（Haemophilus influenzae Rd KW20）	109	9e-25
WP_020002929.1	Type III secretion system ATPase spa47（Shigella flexneri 2a str. 301）	104	2e-23
WP_020002816.1	Type III secretion system ATPase spa47（Shigella flexneri 2a str. 301）	100	2e-22
WP_026365167.1	Iron(III) ABC transporter, ATP-binding protein（Neisseria meningitidis MC58）	89	1e-18
WP_011283796.1	ABC (ATP-binding cassette) transporter CylA（Streptococcus agalactiae NEM316）	85	9e-18
WP_020002891.1	ABC transporter, ATP-binding protein（Neisseria meningitidis MC58）	76	7e-15
WP_020002960.1	Neutrophil activating protein NapA（Helicobacter pylori 26695）	72	2e-14
WP_020003037.1	Flagellar biosynthesis regulator FlhF( Campylobacter jejuni subsp. jejuni NCTC 11168)	70	3e-13
WP_011283244.1	ABC (ATP-binding cassette) transporter CylA(Streptococcus agalactiae NEM316)	70	5e-13
WP_011283822.1	Elongation factor Tu(Francisella tularensis subsp. tularensis SCHU S4)	68	3e-12
WP_020003005.1	Glucose-6-phosphate isomerase(Legionella pneumophila subsp. pneumophila str. Philadelphia 1)	67	2e-12
WP_011283211.1	Elongation factor Tu(Francisella tularensis subsp. tularensis SCHU S4)	66	9e-12
WP_020002826.1	S-layer protein(Bacillus anthracis str. Sterne)	65	3e-11
WP_020003169.1	ABC (ATP-binding cassette) transporter CylB (Streptococcus agalactiae NEM316)	62	1e-10
WP_020003036.1	ATP-binding protein AatC (Escherichia coli O44:H18 042)	55	3e-08
WP_020003216.1	Toxin B (Clostridium difficile 630)	49	4e-06
WP_020002904.1	Exo-alpha-sialidase(Clostridium perfringens ATCC 13124)	48	4e-06
WP_020002844.1	Ndopeptidase Clp ATP-binding chain C(Listeria monocytogenes EGD-e)	45	2e-05
WP_020002948.1	Type VI secretion system ATPase TssH(Klebsiella pneumoniae subsp.pneumoniae NTUH-K2044)	44	8e-05
WP_020003116.1	Coxiella Dot/Icm type IVB secretion system translocated effector, DnaJ domain-containing protein(Coxiella burnetii RSA 493)	44	2e-05
WP_117274884.1	Type VI secretion system secreted protein IglF(Francisella tularensis subsp.tularensis SCHU S4)	44	6e-05
WP_020002871.1	Flagellar hook-length control protein FliK(Campylobacter jejuni subsp. jejuni NCTC 11168)	43	0.0007
WP_020003177.1	Type VI secretion system TssM homolog(Francisella tularensis subsp.tularensis SCHU S4)	41	0.001
WP_020003122.1	Fibronectin-binding protein A(Staphylococcus aureus subsp. aureus MW2)	41	0.0003
WP_020002863.1	Dot/Icm type IV secretion system effector PieC/LirE(Legionella pneumophila subsp. pneumophila str. Philadelphia 1)	40	0.0002
WP_020002784.1	UDP-galactopyranose mutase (Enterococcus faecalis V583)	39	0.002
WP_020002796.1	Listeria adhesion protein Lap (Listeria monocytogenes EGD-e)	39	0.001
WP_046128312.1	Type III secretion system translocator protein EspB, pore protein (Escherichia coli O157:H7 str. EDL933)	39	0.002
WP_081619823.1	Sugar transferase (Campylobacter jejuni subsp. jejuni NCTC 11168)	39	0.002
WP_020002812.1	Dot/Icm type IV secretion system effector LegC2/YlfB (Legionella pneumophila subsp. pneumophila str. Philadelphia 1)	39	0.001
WP_020002995.1	Choline binding protein E (Streptococcus pneumoniae TIGR4)	38	0.002
WP_020002963.1	Motility accessory factor PseE (Campylobacter jejuni subsp. jejuni NCTC 11168)	38	0.0009
WP_020002944.1	Surface-exposed protein, autotransporter(Burkholderia pseudomallei K96243)	38	0.003
WP_026365181.1	Type VI secretion system secreted protein PdpC(Francisella tularensis subsp.tularensis SCHU S4)	37	0.008
WP_020002928.1	Flagellar hook-associated protein 1 FlgK(Helicobacter pylori 26695)	37	0.005
WP_020002738.1	Aggregation substance(Enterococcus faecalis V583)	37	0.004
WP_020002757.1	Heme-acquisition leucine-rich repeat protein(Bacillus anthracis str.Sterne)	37	0.002
WP_020003183.1	Secreted von Willebrand factor-binding protein precursor(Staphylococcus aureus subsp. aureus str. Newman)	37	0.006
WP_020003164.1	Streptococcal exotoxin I precursor(Streptococcus pyogenes M1 GAS)	36	0.005
