# Supplementary material for: Mycoplasma synoviae lipid-associated membrane proteins identification and expression changes when exposed to chicken cells
Source: Front Vet Sci. 2023 Nov 2;10:1249499. doi: 10.3389/fvets.2023.1249499 (PMC10652285; doi:10.3389/fvets.2023.1249499)
Supplement: Supplementary file 9 [file Table_9.XLSX]

## Sheet: Sheet1
Top 200 most abundant LAMP genes fold change identified by RNA-seq
Gene ID	log2(fc)	PValue	FDR
VY93_RS00005	2.49277	8.85e-235	2.23e-234
VY93_RS00070	0.256535	1.71e-15	2.12e-15
VY93_RS00075	-4.64061	1.56e-298	4.69e-298
VY93_RS00085	-2.55565	1.84e-240	4.69e-240
VY93_RS00130	2.96378	0	0
VY93_RS00135	1.26837	7.72e-143	1.62e-142
VY93_RS00255	0.167098	1.9e-07	2.12e-07
VY93_RS00260	-0.665667	6.92e-39	9.76e-39
VY93_RS00265	-1.36984	6.95e-163	1.59e-162
VY93_RS00290	-0.723745	1.55e-11	1.84e-11
VY93_RS00295	0.56763	4.59e-16	5.71e-16
VY93_RS00375	-0.407557	4.11e-42	5.89e-42
VY93_RS00380	-0.564368	3.28e-83	5.67e-83
VY93_RS00385	-1.11537	3.52e-46	5.19e-46
VY93_RS00410	-1.36836	1.29e-171	2.99e-171
VY93_RS00415	-0.0135444	0.751394	0.762895
VY93_RS00425	2.57564	0	0
VY93_RS00450	0.383275	1.05e-06	1.15e-06
VY93_RS00465	0.351379	3.76e-13	4.54e-13
VY93_RS00490	-2.87926	0	0
VY93_RS00535	-1.38655	3.29e-88	5.8e-88
VY93_RS00550	-0.878847	4.2e-90	7.53e-90
VY93_RS00575	2.05345	0	0
VY93_RS00620	-0.0651766	0.0901532	0.09344
VY93_RS00625	0.78898	2.55e-79	4.38e-79
VY93_RS00685	1.36165	1.17e-212	2.83e-212
VY93_RS00785	0.697084	4.75e-105	8.92e-105
VY93_RS00795	0.48729	5.4e-23	7.08e-23
VY93_RS00800	0.178809	2.43e-06	2.64e-06
VY93_RS00815	-0.211904	1.58e-09	1.82e-09
VY93_RS00820	0.76406	1.55e-135	3.12e-135
VY93_RS00825	-0.915008	9.69e-136	1.97e-135
VY93_RS00835	0.978619	6.18e-30	8.48e-30
VY93_RS00840	0.565145	4.41e-18	5.59e-18
VY93_RS00850	0.300437	8.45e-11	9.95e-11
VY93_RS00855	0.421379	6.94e-24	9.14e-24
VY93_RS00860	0.258522	2.2e-13	2.67e-13
VY93_RS00885	-2.59382	1.03e-137	2.11e-137
VY93_RS00940	0.52652	2.31e-20	2.96e-20
VY93_RS00950	2.86649	0	0
VY93_RS00960	3.63185	0	0
VY93_RS00965	2.5157	0	0
VY93_RS01045	1.29521	4e-288	1.17e-287
VY93_RS01055	0.190202	0.000509	0.000544575
VY93_RS01075	5.11772	0	0
VY93_RS01080	5.02879	0	0
VY93_RS01085	5.28	0	0
VY93_RS01090	5.82387	0	0
VY93_RS01105	3.40969	0	0
VY93_RS01145	4.10243	0	0
VY93_RS01160	-5.53846	0	0
VY93_RS01255	-0.80267	2.49e-07	2.76e-07
VY93_RS01465	-3.77453	0	0
VY93_RS01470	0.804264	5.31e-134	1.06e-133
VY93_RS01480	-0.306506	1.75e-09	2.01e-09
VY93_RS01485	-0.308007	5.2e-08	5.91e-08
VY93_RS01490	0.147944	0.0109079	0.0114851
VY93_RS01495	0.00410648	0.929756	0.929756
VY93_RS01545	2.08337	0	0
VY93_RS01620	-2.30116	0	0
VY93_RS01625	-2.94833	0	0
VY93_RS01630	-1.99685	0	0
VY93_RS01635	-0.0702949	0.067095	0.0699052
VY93_RS01640	-0.689118	8.35e-22	1.09e-21
VY93_RS01665	1.59986	2.63361079567955e-313	8.18888356782999e-313
VY93_RS01670	3.12385	0	0
VY93_RS01700	1.2008	1.12e-133	2.21e-133
VY93_RS01720	1.89037	0	0
VY93_RS01725	0.745834	1.37e-89	2.43e-89
VY93_RS01735	2.80935	0	0
VY93_RS01770	0.840744	3.36e-49	5.03e-49
VY93_RS01785	2.953	0	0
VY93_RS01790	1.43521	0	0
VY93_RS01795	1.91945	0	0
VY93_RS01815	3.03342	0	0
VY93_RS01820	1.67562	0	0
VY93_RS01850	-2.80256	0	0
VY93_RS01900	4.30529	0	0
VY93_RS01905	4.33191	0	0
VY93_RS01910	0.841774	5.99e-130	1.17e-129
VY93_RS01915	1.69666	0	0
VY93_RS01925	-0.575259	5.65e-63	9.07e-63
VY93_RS01995	0.0107497	0.847671	0.856276
VY93_RS02010	1.26074	1.05e-52	1.6e-52
VY93_RS02025	0.382942	2.33e-07	2.59e-07
VY93_RS02040	-1.71501	0	0
VY93_RS02055	0.549005	7.45e-28	1e-27
VY93_RS02130	-3.88061	3.4e-301	1.04e-300
VY93_RS02155	1.16446	1.89e-177	4.43e-177
VY93_RS02165	1.55813	0	0
VY93_RS02170	-1.14281	3.39e-143	7.19e-143
VY93_RS02185	-2.0239	0	0
VY93_RS02195	-2.55555	0	0
VY93_RS02225	1.7818	0	0
VY93_RS02230	2.31474	0	0
VY93_RS02235	1.86683	3.38e-69	5.6e-69
VY93_RS02260	-0.844918	2.7e-39	3.84e-39
VY93_RS02265	-1.38115	1.74e-75	2.95e-75
VY93_RS02270	0.508496	8.14e-17	1.02e-16
VY93_RS02305	0.17428	7.62e-07	8.38e-07
VY93_RS02320	-1.42686	1.51e-226	3.76e-226
VY93_RS02345	1.40369	5.75e-241	1.49e-240
VY93_RS02365	0.228276	1.2e-09	1.39e-09
VY93_RS02405	-0.669198	5.62e-46	8.23e-46
VY93_RS02465	0.409361	1.06e-43	1.53e-43
VY93_RS02500	1.02283	2.53e-94	4.7e-94
VY93_RS02505	3.57902	0	0
VY93_RS02510	2.57215	0	0
VY93_RS02515	2.61527	0	0
VY93_RS02520	2.83627	0	0
VY93_RS02525	1.82337	0	0
VY93_RS02560	2.57426	0	0
VY93_RS02605	-2.83248	8.29e-279	2.32e-278
VY93_RS02610	0.0981422	0.0601987	0.0630502
VY93_RS02635	2.09856	0	0
VY93_RS02640	0.816676	2.43e-71	4.07e-71
VY93_RS02645	1.39637	4.27e-178	1.01e-177
VY93_RS02660	-3.12364	7.76e-208	1.86e-207
VY93_RS02680	1.30389	1.84e-155	4.02e-155
VY93_RS02705	1.70531	4.14e-64	6.7e-64
VY93_RS02730	0.0405022	0.2744	0.282931
VY93_RS02820	-0.236149	1.67e-17	2.11e-17
VY93_RS02845	-0.72407	4.89e-120	9.45e-120
VY93_RS02850	0.587258	7.49e-59	1.19e-58
VY93_RS02890	0.41769	2.21e-08	2.52e-08
VY93_RS02895	-0.525525	1.55e-12	1.85e-12
VY93_RS02905	-1.10912	6.19e-51	9.41e-51
VY93_RS02915	-1.81584	3.56e-257	9.33e-257
VY93_RS02945	3.56332	0	0
VY93_RS02955	2.19551	0	0
VY93_RS02970	2.34089	0	0
VY93_RS02980	3.23882	5.54e-269	1.49e-268
VY93_RS02990	-2.42782	4.26e-286	1.21e-285
VY93_RS02995	-1.4077	2.06e-105	3.9e-105
VY93_RS03035	2.26681	0	0
VY93_RS03105	0.413173	4.72e-05	5.1e-05
VY93_RS03150	0.337543	2.25e-27	3.01e-27
VY93_RS03155	-0.568437	2.64e-28	3.6e-28
VY93_RS03160	-0.370768	8.14e-19	1.04e-18
VY93_RS03165	-2.70871	0	0
VY93_RS03170	-2.64878	0	0
VY93_RS03190	-2.79058	2.02e-298	6e-298
VY93_RS03200	1.4118	4.03e-86	7.03e-86
VY93_RS03250	1.07626	3.33e-160	7.45e-160
VY93_RS03270	0.609435	8.25e-56	1.29e-55
VY93_RS03285	1.9253	0	0
VY93_RS03300	1.13959	2.64e-278	7.29e-278
VY93_RS03305	1.97664	0	0
VY93_RS03315	1.19684	1.19e-91	2.18e-91
VY93_RS03330	-0.0105146	0.897195	0.901726
VY93_RS03340	-0.728128	1.93e-38	2.71e-38
VY93_RS03345	-0.430084	1.35e-20	1.75e-20
VY93_RS03360	-1.30101	1.01e-225	2.49e-225
VY93_RS03380	-1.66072	2.85e-263	7.57e-263
VY93_RS03400	2.26124	0	0
VY93_RS03405	-1.25507	4.44e-142	9.21e-142
VY93_RS03410	-1.46835	7.54e-94	1.39e-93
VY93_RS03415	-0.76238	7.78e-14	9.56e-14
VY93_RS03420	-0.938655	4.56e-32	6.3e-32
VY93_RS03425	-1.5489	1.95e-64	3.18e-64
VY93_RS03430	-1.1184	2.42e-45	3.52e-45
VY93_RS03435	-1.02508	6.27e-28	8.49e-28
VY93_RS03445	0.0925439	0.298227	0.305914
VY93_RS03455	-2.08843	2.4e-74	4.05e-74
VY93_RS03460	-1.5054	1.08e-46	1.6e-46
VY93_RS03470	-0.522676	1.73e-07	1.94e-07
VY93_RS03475	0.650305	4.67e-11	5.53e-11
VY93_RS03480	-0.709533	1.73e-10	2.03e-10
VY93_RS03485	-1.41885	1.34e-25	1.77e-25
VY93_RS03490	0.57319	9.74e-14	1.19e-13
VY93_RS03495	-0.0848167	0.328592	0.335332
VY93_RS03500	0.225593	0.000477649	0.000513796
VY93_RS03505	0.26559	1.7e-07	1.92e-07
VY93_RS03510	-1.58741	3.12e-54	4.84e-54
VY93_RS03515	-1.98346	1.02e-156	2.25e-156
VY93_RS03530	-0.127002	0.000634005	0.00067469
VY93_RS03550	-1.49981	0	0
VY93_RS03555	-1.71474	0	0
VY93_RS03565	-1.12939	8.01e-51	1.21e-50
VY93_RS03570	1.21864	2.82087867437481e-316	8.91039452639759e-316
VY93_RS03575	1.16659	3.53e-272	9.63e-272
VY93_RS03580	1.19985	0	0
VY93_RS03585	1.09779	3.31e-155	7.17e-155
VY93_RS03590	0.920142	3.51e-147	7.52e-147
VY93_RS03600	1.64722	0	0
VY93_RS03625	0.270684	0.00173358	0.00183501
VY93_RS03630	-0.488458	8.56e-67	1.41e-66
VY93_RS03670	-0.719271	2.29e-35	3.19e-35
VY93_RS03685	1.05115	1.1e-119	2.1e-119
VY93_RS03690	0.94379	6.01e-56	9.49e-56
VY93_RS03695	1.27218	1.54e-90	2.78e-90
VY93_RS03780	0.578264	1.48e-53	2.28e-53
VY93_RS03785	2.40579	0	0
VY93_RS03795	2.49338	0	0
VY93_RS03855	3.27076	0	0
VY93_RS04075	-3.18193	4.71e-162	1.07e-161
VY93_RS04120	-3.34521	1.55e-287	4.46e-287
VY93_RS04195	5.35207	0	0
VY93_RS04285	2.75709	0	0
